# Supplementary material for: Mining for New Sources of Resistance to Powdery Mildew in Genetic Resources of Winter Wheat
Source: Front Plant Sci. 2022 Mar 1;13:836723. doi: 10.3389/fpls.2022.836723 (PMC8922026; doi:10.3389/fpls.2022.836723)
Supplement: Supplementary file 1 [file Table_1.XLSX]

## Sheet: Candidates_Overview_SupV1.1_val
Chr	known genes	MTA.NR	SNP	Traes_ID	PAF_PGR	PAF_Elite	#NAME?	R.sqared	Description	Comments
1A	Pm3a-r (3,9,94) Pm223899 (80) Pm17 (4,22) Pm25 (24)	1	S1_393999237	TraesCS1A02G223500	0.9617	1	5.45	2e-05	Papain-like cysteine peptidase superfamily
1A		2	S1_574940619	TraesCS1A02G416800	0.0031	0	5.27	0.01	no known Domain
1A		2	S1_574940619	TraesCS1A02G416900	0.0031	0	5.27	0.013	no known Domain
1A		2	S1_574940619	TraesCS1A02G417000	0.0031	0	5.27	0.013	P-loop containing nucleoside triphosphate hydrolase
1A		2	S1_574940619	TraesCS1A02G417100	0.0031	0	5.27	0.013	no known Domain
1A		2	S1_574940619	TraesCS1A02G417200	0.0031	0	5.27	0.013	no known Domain
1A		2	S1_574940619	TraesCS1A02G417300	0.0031	0	5.27	0.013	Peroxisomal membrane protein 14
1A		2	S1_574940619	TraesCS1A02G417400	0.0031	0	5.27	0.013	RNA-binding domain superfamily
1A		2	S1_574940619	TraesCS1A02G417500	0.0031	0	5.27	0.013	Formyl transferase, N-terminal domain superfamily
1A		2	S1_574940619	TraesCS1A02G417600	0.0031	0	5.27	0.013	no known Domain
1A		2	S1_574940619	TraesCS1A02G417700	0.0031	0	5.27	0.013	Protein of unknown function DUF1645, plant
1A		2	S1_574940619	TraesCS1A02G417800	0.0031	0	5.27	0.013	NAD(P)-binding domain superfamily
1A		2	S1_574940619	TraesCS1A02G417900	0.0031	0	5.27	0.013	Amidase signature (AS) superfamily
1A		2	S1_574940619	TraesCS1A02G418000	0.0031	0	5.27	0.013	Pectin lyase fold/virulence factor
1A		2	S1_574940619	TraesCS1A02G418100	0.0031	0	5.27	0.013	no known Domain
1A		2	S1_574940619	TraesCS1A02G418200	0.0031	0	5.27	0.013	Zinc finger, GATA-type
2A	Pm4a-e (10,23,76,75,77) Pm50 (47) PmPS5A (31) PmLK906 (58) Pm65 (64) Ml92145E8-9 (68)	3	S2_508047898	TraesCS2A02G295200	0.0033	0	5.19	0.006	P-loop containing nucleoside triphosphate hydrolase
2A		3	S2_508047898	TraesCS2A02G295300	0.0033	0	5.19	0.006	The fantastic four family
2A		3	S2_508047898	TraesCS2A02G295400	0.0033	0	5.19	0.006	Glycosyl hydrolase, five-bladed beta-propellor domain superfamily
2A		4	S2_737875914	TraesCS2A02G512800	0.0031	0	6.12	0.013	no known Domain
2A		4	S2_737875914	TraesCS2A02G512900	0.0031	0	6.12	0.013	no known Domain
2A		5	S2_764196305	TraesCS2A02G563700	0.0015	0	8.3	0.007	Jacalin-like lectin domain superfamily	TraesCS2A02G563900 encodes for a Receptor Kinase-Like Protein, carrying multiple LRR- and a Protein kinase domain as well as a transmembrane domain and a signal peptide. The role of Receptor-Like Kinases resistance proteins has been well described in rice (Xa21 & LysM) Song et al. (1995); Joris et al. (1992), wheat (TaRLK1 & 2, Pm21) Chen et al. (2016); He et al. (2018), and Arabidopsis (EFR) Kak…
2A		5	S2_764196305	TraesCS2A02G563800	0.0015	0	8.3	0.007	no known Domain
2A		5	S2_764196305	TraesCS2A02G563900	0.0015	0	8.3	0.007	Protein kinase-like domain superfamily
2A		5	S2_764196305	TraesCS2A02G564000	0.0015	0	8.3	0.007	PA domain
2A		5	S2_764196305	TraesCS2A02G564100	0.0015	0	8.3	0.007	no known Domain
3A	Pm44 (42)	6	S3_549620866	TraesCS3A02G310100	0.0098	0	5.38	0.005	Alpha/Beta hydrolase fold	These genes are predicted to serve various functions like Protein - DNA interaction (DNA-binding pseudobarrel domain, Transcription factor NFX1), protein interaction (Tetratricopeptide-like helical domain), serine carboxypeptidase and others. None of these genes is predicted to be a classical LRR-domain containing R-Gene.
3A		6	S3_549620866	TraesCS3A02G310200	0.0098	0	5.38	0.005	Phloem protein 2-like
3A		6	S3_549620866	TraesCS3A02G310300	0.0098	0	5.38	0.005	Pyridoxal phosphate-dependent transferase domain 1
3A		6	S3_549620866	TraesCS3A02G310400	0.0098	0	5.38	0.005	Aminoacyl-tRNA synthetase, class Ia, anticodon-binding
3A		6	S3_549620866	TraesCS3A02G310500	0.0098	0	5.38	0.005	DNA-binding pseudobarrel domain superfamily
3A		6	S3_549620866	TraesCS3A02G310600	0.0098	0	5.38	0.005	DNA-binding pseudobarrel domain superfamily
3A		6	S3_549620866	TraesCS3A02G310700	0.0098	0	5.38	0.005	Transcription factor NFX1 family
3A		6	S3_549620866	TraesCS3A02G310800	0.0098	0	5.38	0.005	Tetratricopeptide-like helical domain superfamily
3A		6	S3_549620866	TraesCS3A02G310900	0.0098	0	5.38	0.005	no known Domain
3A		6	S3_549620866	TraesCS3A02G311000	0.0098	0	5.38	0.005	FAD-linked oxidase-like, C-terminal
3A		6	S3_549620866	TraesCS3A02G311100	0.0098	0	5.38	0.005	FAD-linked oxidase-like, C-terminal
3A		6	S3_549620866	TraesCS3A02G311200	0.0098	0	5.38	0.005
3A		7	S3_662816725	TraesCS3A02G420500	0.0063	0	5.35	0.007	Peptidase S8/S53 domain superfamily	Trichome birefringence-like proteins are known for their acetylation cell wall oligogalacturonides - well known DAMPs Ferrari et al. (2013) The acetylation of those oligogalacturonides is thereby essential for PM danger triggered immunity in wheat Randoux et al. (2010). PMR5 is a well described PM resistance gene in Arabidopsis encoding a Trichome birefringence-like protein Chiniquy et al. (2019)…
3A		7	S3_662816725	TraesCS3A02G420600	0.0063	0	5.35	0.007	no known Domain
3A		7	S3_662816725	TraesCS3A02G420700	0.0063	0	5.35	0.007	no known Domain
3A		7	S3_662816725	TraesCS3A02G420800	0.0063	0	5.35	0.007	Trichome birefringence-like family
3A		7	S3_662816725	TraesCS3A02G420900	0.0063	0	5.35	0.007	Protein of unknown function PDDEXK-like
3A		7	S3_662816725	TraesCS3A02G421000	0.0063	0	5.35	0.007	Cystatin domain
3A		7	S3_662816725	TraesCS3A02G421100	0.0063	0	5.35	0.007	no known Domain
3A		7	S3_662816725	TraesCS3A02G421200	0.0063	0	5.35	0.007	no known Domain
3A		7	S3_662816725	TraesCS3A02G421300	0.0063	0	5.35	0.007	FKBP-type peptidyl-prolyl cis-trans isomerase domain
3A		8	S3_711253219	TraesCS3A02G480100	0.0014	0	5.88	0.003	Cytochrome P450 superfamily	This class of genes serves a long list of different functions in multiple pathways Jun et al. (2015). Their involvement in resistance against pathogen resistance was also shown by playing a role in the biosynthesis of phytoalexins, the regulation of jasmonic acid and other relevant metabolites involved in pathogen resistance Park et al. (2002). Delventhal et al. (2014) showed the involvement of t…
3A		9	S3_730651031	nothing	0.003	0	6.2	0.014	no known Domain
5A	Pm55 (2) pm2026 (57)	10	S5_454770560	TraesCS5A02G238600	0.0038	0	6.4	0.013	Xyloglucan fucosyltransferase
7A	Pm1a-e (3,4,7) Pm9 (4) Pm37 (35) Pm59 (1) PmU (54) Mlm2033 (56) Mlm80 (56) Pm60a-c (65,92)	11	S7_184941091	nothing	0.0098	0	6.58	0.012	no known Domain
7A		12	S7_722211697	nothing	0.0097	0.01	7.84	0.012	no known Domain
7A		13	S7_722211742	TraesCS7A02G546800	0.0094	0.01	7.53	0.011	Protein of unknown function DUF241, plant
7A		13	S7_722211742	TraesCS7A02G546900	0.0094	0.01	7.53	0.011	SKP1/BTB/POZ domain superfamily
7A		13	S7_722211742	TraesCS7A02G547000	0.0094	0.01	7.53	0.011	SKP1/BTB/POZ domain superfamily
7A		13	S7_722211742	TraesCS7A02G547100	0.0094	0.01	7.53	0.011	SKP1/BTB/POZ domain superfamily
7A		14	S7_723259294	TraesCS7A02G547300	0.0097	0.01	6.94	0.013	Protein of unknown function DUF241, plant
7A		14	S7_723259294	TraesCS7A02G547400	0.0097	0.01	6.94	0.013	Protein of unknown function DUF241, plant
7A		14	S7_723259294	TraesCS7A02G547500	0.0097	0.01	6.94	0.013	P-loop containing nucleoside triphosphate hydrolase
7A		14	S7_723259294	TraesCS7A02G547600	0.0097	0.01	6.94	0.013	no known Domain
7A		14	S7_723259294	TraesCS7A02G547700	0.0097	0.01	6.94	0.013	Papain-like cysteine peptidase superfamily
7A		14	S7_723259294	TraesCS7A02G548000	0.0097	0.01	6.94	0.013	Lysozyme-like domain superfamily
7A		14	S7_723259294	TraesCS7A02G548100	0.0097	0.01	6.94	0.013	Lysozyme-like domain superfamily
7A		14	S7_723259294	TraesCS7A02G548200	0.0097	0.01	6.94	0.013	Lysozyme-like domain superfamily
7A		14	S7_723259294	TraesCS7A02G548300	0.0097	0.01	6.94	0.013	Zinc finger C2H2 superfamily
7A		14	S7_723259294	TraesCS7A02G548400	0.0097	0.01	6.94	0.013	Zinc finger C2H2 superfamily
7A		14	S7_723259294	TraesCS7A02G548500	0.0097	0.01	6.94	0.013	Zinc finger C2H2 superfamily
7A		14	S7_723259294	TraesCS7A02G548600	0.0097	0.01	6.94	0.013	Zinc finger C2H2-type
7A		14	S7_723259294	TraesCS7A02G548700	0.0097	0.01	6.94	0.013	Zinc finger C2H2 superfamily
7A		14	S7_723259294	TraesCS7A02G548800	0.0097	0.01	6.94	0.013	Zinc finger C2H2 superfamily
7A		14	S7_723259294	TraesCS7A02G548900	0.0097	0.01	6.94	0.013	Zinc finger C2H2-type
7A		14	S7_723259294	TraesCS7A02G549000	0.0097	0.01	6.94	0.013	NAC domain superfamily
7A		14	S7_723259294	TraesCS7A02G549100	0.0097	0.01	6.94	0.013	Glycoside hydrolase superfamily
7A		15	S7_725136049	nothing	0.0101	0.01	7.78	0.012	no known Domain
7A		16	S7_725136082	TraesCS7A02G551600	0.0097	0.01	7.07	0.013	Protein of unknown function DUF707
7A		17	S7_725212046	nothing	0.0101	0.01	9.14	0.013	no known Domain
7A		18	S7_725212071	TraesCS7A02G551800	0.0117	0.01	9.14	0.01	Glycosyl transferase, family 14
7A		19	S7_725212099	TraesCS7A02G551800	0.0098	0.01	6.43	0.013	Glycosyl transferase, family 14
7A		20	S7_725823040	TraesCS7A02G552900	0.0074	0.01	6.98	0.011	F-box-like domain superfamily
7A		21	S7_725823086	nothing	0.0071	0.01	8.25	0.011	no known Domain
7A		22	S7_725823128	nothing	0.0078	0.01	5.29	0.01	no known Domain
7A		23	S7_728014266	nothing	0.0089	0.01	5.99	0.013	no known Domain
7A		24	S7_728289338	nothing	0.0087	0.01	10.06	0.011	no known Domain
7A		25	S7_729941334	TraesCS7A02G557400	0.0074	0.01	6.74	0.009	Ribonuclease H-like superfamily
7A		25	S7_729941334	TraesCS7A02G557500	0.0074	0.01	6.74	0.009	Dynamin superfamily
7A		26	S7_736526838	TraesCS7A02G569400	0.0018	0.01	5.29	0.009	Phosphatidylinositol-4-phosphate 5-kinase, plant
1B	Pm8 (4) Pm32 (6) Pm39 (36) Pm28 (27)	27	S8_145572235	nothing	0.004	0	8.1	0.022	no known Domain
1B		28	S8_447318280	TraesCS1B02G252500	0.0034	0	6.8	0.022	Protein kinase-like domain superfamily
1B		28	S8_447318280	TraesCS1B02G252600	0.0034	0	6.8	0.022	P-loop containing nucleoside triphosphate hydrolase
1B		28	S8_447318280	TraesCS1B02G252700	0.0034	0	6.8	0.022	Regulator of chromosome condensation 1/beta-lactamase-inhibitor protein II
1B		28	S8_447318280	TraesCS1B02G252800	0.0034	0	6.8	0.022	RlpA-like domain superfamily
1B		28	S8_447318280	TraesCS1B02G252900	0.0034	0	6.8	0.022	Prismane-like superfamily
1B		28	S8_447318280	TraesCS1B02G253000	0.0034	0	6.8	0.022	Protein of unknown function DUF4228, plant
1B		28	S8_447318280	TraesCS1B02G253100	0.0034	0	6.8	0.022	no known Domain
1B		28	S8_447318280	TraesCS1B02G253200	0.0034	0	6.8	0.022	SHI protein family
1B		28	S8_447318280	TraesCS1B02G253300	0.0034	0	6.8	0.022	SAWADEE domain
1B		28	S8_447318280	TraesCS1B02G253400	0.0034	0	6.8	0.022	Nucleotide-diphospho-sugar transferases
1B		28	S8_447318280	TraesCS1B02G253500	0.0034	0	6.8	0.022	NAD(P)-binding domain superfamily
1B		28	S8_447318280	TraesCS1B02G253600	0.0034	0	6.8	0.022	Cytochrome P450 superfamily
1B		28	S8_447318280	TraesCS1B02G253700	0.0034	0	6.8	0.022	Protein N-terminal glutamine amidohydrolase
1B		28	S8_447318280	TraesCS1B02G253800	0.0034	0	6.8	0.022	no known Domain
1B		29	S8_596040017	TraesCS1B02G365100	0.0042	0	7.63	0.023	Senescence regulator S40
1B		29	S8_596040017	TraesCS1B02G365200	0.0042	0	7.63	0.023	Senescence regulator S40
1B		29	S8_596040017	TraesCS1B02G365300	0.0042	0	7.63	0.023	Haem peroxidase superfamily
2B	Pm26 (25) Pm42 (40) Pm49 (46) Pm6 (14,15,66) Pm33 (31) Pm51 (48) Pm52 (72) Pm57 (49,87) Pm63 (62) Pm64 (59) Pm68 (63) PmQ (91)	30	S9_26574599	TraesCS2B02G054600	0.0038	0.03	20.32	0.022	Histidine phosphatase superfamily	Candidates for Pm26 Some of them show a classical NB-LRR structure (TraesCS2B02G054900, TraesCS2B02G055000, TraesCS2B02G055300) others encode for SWEET genes (TraesCS2B02G055700-TraesCS2B02G056100). Sugar transporters are known susceptibility genes for biotrophic pathogens Chen et al. (2010); Gupta (2020). Nevertheless, without further evaluation it is not feasible to narrow the possible candidat…
2B		30	S9_26574599	TraesCS2B02G054700	0.0038	0.03	20.32	0.022	Histidine phosphatase superfamily
2B		30	S9_26574599	TraesCS2B02G054800	0.0038	0.03	20.32	0.022	Histidine phosphatase superfamily
2B		30	S9_26574599	TraesCS2B02G054900	0.0038	0.03	20.32	0.022	P-loop containing nucleoside triphosphate hydrolase
2B		30	S9_26574599	TraesCS2B02G055000	0.0038	0.03	20.32	0.022	P-loop containing nucleoside triphosphate hydrolase
2B		30	S9_26574599	TraesCS2B02G055100	0.0038	0.03	20.32	0.022	NAD(P)-binding domain superfamily
2B		30	S9_26574599	TraesCS2B02G055200	0.0038	0.03	20.32	0.022	P-loop containing nucleoside triphosphate hydrolase
2B		30	S9_26574599	TraesCS2B02G055300	0.0038	0.03	20.32	0.022	P-loop containing nucleoside triphosphate hydrolase
2B		30	S9_26574599	TraesCS2B02G055400	0.0038	0.03	20.32	0.022	Transferase
2B		30	S9_26574599	TraesCS2B02G055500	0.0038	0.03	20.32	0.022	Jacalin-like lectin domain superfamily
2B		30	S9_26574599	TraesCS2B02G055600	0.0038	0.03	20.32	0.022	Jacalin-like lectin domain superfamily
2B		30	S9_26574599	TraesCS2B02G055700	0.0038	0.03	20.32	0.022	SWEET sugar transporter
2B		30	S9_26574599	TraesCS2B02G055800	0.0038	0.03	20.32	0.022	SWEET sugar transporter
2B		30	S9_26574599	TraesCS2B02G055900	0.0038	0.03	20.32	0.022	SWEET sugar transporter
2B		30	S9_26574599	TraesCS2B02G056000	0.0038	0.03	20.32	0.022	SWEET sugar transporter
2B		30	S9_26574599	TraesCS2B02G056100	0.0038	0.03	20.32	0.022	SWEET sugar transporter
2B		30	S9_26574599	TraesCS2B02G056300	0.0038	0.03	20.32	0.022	WRKY domain superfamily
2B		30	S9_26574599	TraesCS2B02G056400	0.0038	0.03	20.32	0.022	WRKY domain superfamily
2B		30	S9_26574599	TraesCS2B02G056500	0.0038	0.03	20.32	0.022	P-loop containing nucleoside triphosphate hydrolase
2B		30	S9_26574599	TraesCS2B02G056600	0.0038	0.03	20.32	0.022	no known Domain
2B		30	S9_26574599	TraesCS2B02G056700	0.0038	0.03	20.32	0.022	Jacalin-like lectin domain superfamily
2B		30	S9_26574599	TraesCS2B02G056800	0.0038	0.03	20.32	0.022	Formin, FH2 domain
2B		30	S9_26574599	TraesCS2B02G056900	0.0038	0.03	20.32	0.022	Chromo-like domain superfamily
2B		30	S9_26574599	TraesCS2B02G057000	0.0038	0.03	20.32	0.022	Chromo-like domain superfamily
2B		30	S9_26574599	TraesCS2B02G057100	0.0038	0.03	20.32	0.022	Cytochrome P450 superfamily
2B		30	S9_26574599	TraesCS2B02G057200	0.0038	0.03	20.32	0.022	ELMO domain
2B		30	S9_26574599	TraesCS2B02G057300	0.0038	0.03	20.32	0.022	von Willebrand factor A-like domain superfamily
2B		31	S9_473307310	TraesCS2B02G329400	0.0033	0	6.21	0.022	P-loop containing nucleoside triphosphate hydrolase
2B		31	S9_473307310	TraesCS2B02G329500	0.0033	0	6.21	0.022	P-loop containing nucleoside triphosphate hydrolase
2B		31	S9_473307310	TraesCS2B02G329600	0.0033	0	6.21	0.022	Ferredoxin-NADP reductase (FNR), nucleotide-binding domain
2B		31	S9_473307310	TraesCS2B02G329700	0.0033	0	6.21	0.022	Zinc finger, FYVE/PHD-type
2B		32	S9_751571378	TraesCS2B02G556700	0.0015	0	8.72	0.01	RNA-binding domain superfamily
2B		32	S9_751571378	TraesCS2B02G556800	0.0015	0	8.72	0.01	no known Domain
4B	Pm7 (6,16)	33	S11_526737497	TraesCS4B02G258700	0.0035	0	7.75	0.016	no known Domain
4B		33	S11_526737497	TraesCS4B02G258800	0.0035	0	7.75	0.016	F-box-like domain superfamily
4B		33	S11_526737497	TraesCS4B02G258900	0.0035	0	7.75	0.016	Myb/SANT-like domain
4B		33	S11_526737497	TraesCS4B02G259000	0.0035	0	7.75	0.016	Leucine-rich repeat
4B		33	S11_526737497	TraesCS4B02G259100	0.0035	0	7.75	0.016	Glycoside hydrolase superfamily
4B		33	S11_526737497	TraesCS4B02G259109	0.0035	0	7.75	0.016	Tetratricopeptide-like helical domain superfamily
4B		33	S11_526737497	TraesCS4B02G259200	0.0035	0	7.75	0.016	DHBP synthase RibB-like alpha/beta domain superfamily
4B		33	S11_526737497	TraesCS4B02G259300	0.0035	0	7.75	0.016	no known Domain
4B		33	S11_526737497	TraesCS4B02G259400	0.0035	0	7.75	0.016	Glycoside hydrolase superfamily
4B		33	S11_526737497	TraesCS4B02G259500	0.0035	0	7.75	0.016	P-loop containing nucleoside triphosphate hydrolase
5B	Pm66(83) Pm30 (29) Pm36 (34)	34	S12_513713250	nothing	0.0029	0	5.7	0.015	no known Domain
5B		35	S12_71785130	nothing	0.0027	0	5.19	0.015	no known Domain
6B	Pm11 (18) Pm12 (50) Pm14 (19) Pm15 (19) Pm20 (16) Pm54 (22) pmHYM (85) Pm27 (26)	36	S13_431701067	nothing	0.0014	0	5.71	0.004	no known Domain
6B		37	S13_697616215	TraesCS6B02G429800	0.0014	0.05	7.45	0.005	F-box-like domain superfamily	New resistance mechanism most likely enriched through trait selection in the Elite wheat population As described before, most of the positive alleles for the significant MTA were rare in the PGR and almost or completely absent in the Elite Panel. An exception to this pattern was the MTA37. While very rare in the PGR, the three significant SNPs underlying MTA37 were enriched in the Elite Panel. Th…
6B		37	S13_697616215	TraesCS6B02G429900	0.0014	0.05	7.45	0.005	Leucine-rich repeat
6B		37	S13_697616215	TraesCS6B02G430000	0.0014	0.05	7.45	0.005	Protein kinase-like domain superfamily
6B		37	S13_697616215	TraesCS6B02G430100	0.0014	0.05	7.45	0.005	NAD(P)-binding domain superfamily
7B	Pm40 (14,38) Pm47 (45) Pm5a-e (5,11,12) pmDHT (70) Mlxbd (13,86) PmSGD (69) PmBYYT (82)	38	S14_336718572	TraesCS7B02G195500	0.0037	0	5.33	0.006	Protein kinase-like domain superfamily
7B		38	S14_336718572	TraesCS7B02G195600	0.0037	0	5.33	0.006	no known Domain
7B		38	S14_336718572	TraesCS7B02G195700	0.0037	0	5.33	0.006	Protein kinase-like domain superfamily
7B		38	S14_336718572	TraesCS7B02G195800	0.0037	0	5.33	0.006	Helix-loop-helix DNA-binding domain superfamily
1D	Pm24 (13,74) Pm67 (78) Pm10 (17)	39	S15_404493140	TraesCS1D02G305900	0.0059	0	5.15	0.011	P-loop containing nucleoside triphosphate hydrolase
1D		39	S15_404493140	TraesCS1D02G306000	0.0059	0	5.15	0.011	Plant bZIP transcription factors
1D		39	S15_404493140	TraesCS1D02G306100	0.0059	0	5.15	0.011	Histone-fold
1D		39	S15_404493140	TraesCS1D02G306200	0.0059	0	5.15	0.011	Chlorophyll A-B binding protein, plant
1D		39	S15_404493140	TraesCS1D02G306300	0.0059	0	5.15	0.011	F-box-like domain superfamily
1D		39	S15_404493140	TraesCS1D02G306400	0.0059	0	5.15	0.011	F-box-like domain superfamily
1D		39	S15_404493140	TraesCS1D02G306500	0.0059	0	5.15	0.011	F-box-like domain superfamily
1D		39	S15_404493140	TraesCS1D02G306600	0.0059	0	5.15	0.011	Protein kinase-like domain superfamily
1D		39	S15_404493140	TraesCS1D02G306700	0.0059	0	5.15	0.011	KRR1 interacting protein 1
1D		39	S15_404493140	TraesCS1D02G306800	0.0059	0	5.15	0.011	50S ribosomal protein L30e-like
1D		39	S15_404493140	TraesCS1D02G306900	0.0059	0	5.15	0.011	Tapetum determinant 1
1D		39	S15_404493140	TraesCS1D02G307000	0.0059	0	5.15	0.011	Tapetum determinant 1
1D		39	S15_404493140	TraesCS1D02G307100	0.0059	0	5.15	0.011	Endoplasmic reticulum vesicle transporter, C-terminal
1D		39	S15_404493140	TraesCS1D02G307200	0.0059	0	5.15	0.011	F-box-like domain superfamily
1D		39	S15_404493140	TraesCS1D02G307300	0.0059	0	5.15	0.011	no known Domain
1D		39	S15_404493140	TraesCS1D02G307400	0.0059	0	5.15	0.011	no known Domain
1D		39	S15_404493140	TraesCS1D02G307500	0.0059	0	5.15	0.011	Homeobox-like domain superfamily
1D		39	S15_404493140	TraesCS1D02G307600	0.0059	0	5.15	0.011	FAD/NAD(P)-binding domain superfamily
1D		39	S15_404493140	TraesCS1D02G307700	0.0059	0	5.15	0.011	PUA-like superfamily
1D		39	S15_404493140	TraesCS1D02G307800	0.0059	0	5.15	0.011	Nucleophile aminohydrolases, N-terminal
1D		39	S15_404493140	TraesCS1D02G307900	0.0059	0	5.15	0.011	no known Domain
1D		39	S15_404493140	TraesCS1D02G308000	0.0059	0	5.15	0.011	EF-hand domain pair
1D		39	S15_404493140	TraesCS1D02G308100	0.0059	0	5.15	0.011	EF-hand domain pair
1D		39	S15_404493140	TraesCS1D02G308200	0.0059	0	5.15	0.011	ASC domain superfamily
1D		39	S15_404493140	TraesCS1D02G308300	0.0059	0	5.15	0.011	Leucine-rich repeat
1D		39	S15_404493140	TraesCS1D02G308400	0.0059	0	5.15	0.011	Leucine-rich repeat
1D		39	S15_404493140	TraesCS1D02G308500	0.0059	0	5.15	0.011	Leucine-rich repeat
1D		39	S15_404493140	TraesCS1D02G308600	0.0059	0	5.15	0.011	Homeobox-like domain superfamily
1D		39	S15_404493140	TraesCS1D02G308700	0.0059	0	5.15	0.011	Sigma factor binding protein 1/2
1D		39	S15_404493140	TraesCS1D02G308800	0.0059	0	5.15	0.011	Protein kinase-like domain superfamily
1D		39	S15_404493140	TraesCS1D02G308821	0.0059	0	5.15	0.011	P-loop containing nucleoside triphosphate hydrolase
1D		39	S15_404493140	TraesCS1D02G308900	0.0059	0	5.15	0.011	Domain of unknown function DUF4220
1D		39	S15_404493140	TraesCS1D02G309000	0.0059	0	5.15	0.011	P-loop containing nucleoside triphosphate hydrolase
1D		39	S15_404493140	TraesCS1D02G309100	0.0059	0	5.15	0.011	no known Domain
1D		39	S15_404493140	TraesCS1D02G309200	0.0059	0	5.15	0.011	Tubulin/FtsZ, GTPase domain superfamily
1D		39	S15_404493140	TraesCS1D02G309300	0.0059	0	5.15	0.011	Cyclin-like superfamily
1D		39	S15_404493140	TraesCS1D02G309400	0.0059	0	5.15	0.011	Cyclin-like superfamily
1D		39	S15_404493140	TraesCS1D02G309500	0.0059	0	5.15	0.011	BURP domain
1D		39	S15_404493140	TraesCS1D02G309600	0.0059	0	5.15	0.011	ABC transporter type 1, transmembrane domain superfamily
1D		39	S15_404493140	TraesCS1D02G309700	0.0059	0	5.15	0.011	UDP-glucuronosyl/UDP-glucosyltransferase
1D		39	S15_404493140	TraesCS1D02G309800	0.0059	0	5.15	0.011	WAT1-related protein
1D		39	S15_404493140	TraesCS1D02G309900	0.0059	0	5.15	0.011	Formiminotransferase catalytic domain superfamily
1D		39	S15_404493140	TraesCS1D02G310000	0.0059	0	5.15	0.011	Cytochrome P450 superfamily
1D		39	S15_404493140	TraesCS1D02G310100	0.0059	0	5.15	0.011	Aldehyde/histidinol dehydrogenase
1D		39	S15_404493140	TraesCS1D02G310200	0.0059	0	5.15	0.011	Histone-fold
1D		39	S15_404493140	TraesCS1D02G310300	0.0059	0	5.15	0.011	Cystatin
1D		39	S15_404493140	TraesCS1D02G310400	0.0059	0	5.15	0.011	no known Domain
1D		39	S15_404493140	TraesCS1D02G310500	0.0059	0	5.15	0.011	no known Domain
1D		39	S15_404493140	TraesCS1D02G310600	0.0059	0	5.15	0.011	no known Domain
1D		39	S15_404493140	TraesCS1D02G310700	0.0059	0	5.15	0.011	Transcription factor, MADS-box superfamily
1D		40	S15_406690808	TraesCS1D02G310800	0.0015	0	6.59	0.014	CcmH/CycL/Ccl2/NrfF family
1D		40	S15_406690808	TraesCS1D02G310900	0.0015	0	6.59	0.014	Sugar phosphate transporter domain
1D		40	S15_406690808	TraesCS1D02G311000	0.0015	0	6.59	0.014	Pectin lyase fold/virulence factor
1D		40	S15_406690808	TraesCS1D02G311100	0.0015	0	6.59	0.014	F-box-like domain superfamily
1D		40	S15_406690808	TraesCS1D02G311200	0.0015	0	6.59	0.014	Phosphatidylinositol-glycan biosynthesis class X protein
1D		40	S15_406690808	TraesCS1D02G311300	0.0015	0	6.59	0.014	no known Domain
1D		41	S15_433215438	TraesCS1D02G344800	0.0014	0	5.48	0.013	Inorganic pyrophosphatase superfamily
1D		41	S15_433215438	TraesCS1D02G344900	0.0014	0	5.48	0.013	NAD(P)-binding domain superfamily
2D	Pm43 (14,41)	42	S16_366162718	TraesCS2D02G281800	0.0015	0	8.48	0.01	no known Domain
2D		42	S16_366162718	TraesCS2D02G281900	0.0015	0	8.48	0.01	DNA-binding pseudobarrel domain superfamily
2D		42	S16_366162718	TraesCS2D02G282000	0.0015	0	8.48	0.01	DNA primase, large subunit, eukaryotic
2D		42	S16_366162718	TraesCS2D02G282100	0.0015	0	8.48	0.01	no known Domain
2D		42	S16_366162718	TraesCS2D02G282200	0.0015	0	8.48	0.01	Transcription factor, MADS-box superfamily
2D		42	S16_366162718	TraesCS2D02G282300	0.0015	0	8.48	0.01	no known Domain
2D		42	S16_366162718	TraesCS2D02G282400	0.0015	0	8.48	0.01	no known Domain
2D		42	S16_366162718	TraesCS2D02G282500	0.0015	0	8.48	0.01	Protein of unknown function DUF3339
2D		42	S16_366162718	TraesCS2D02G282700	0.0015	0	8.48	0.01	Protein of unknown function DUF3339
2D		42	S16_366162718	TraesCS2D02G282800	0.0015	0	8.48	0.01	Ankyrin repeat-containing domain superfamily
2D		42	S16_366162718	TraesCS2D02G282900	0.0015	0	8.48	0.01	no known Domain
2D		42	S16_366162718	TraesCS2D02G283000	0.0015	0	8.48	0.01	MFS transporter superfamily
2D		42	S16_366162718	TraesCS2D02G283100	0.0015	0	8.48	0.01	Chaperone J-domain superfamily
2D		42	S16_366162718	TraesCS2D02G283200	0.0015	0	8.48	0.01	LSM domain superfamily
2D		42	S16_366162718	TraesCS2D02G283300	0.0015	0	8.48	0.01	Thiamin diphosphate-binding fold
2D		42	S16_366162718	TraesCS2D02G283400	0.0015	0	8.48	0.01	Oligopeptide transporter, OPT superfamily
2D		42	S16_366162718	TraesCS2D02G283500	0.0015	0	8.48	0.01	no known Domain
2D		42	S16_366162718	TraesCS2D02G283600	0.0015	0	8.48	0.01	Oligopeptide transporter, OPT superfamily
2D		42	S16_366162718	TraesCS2D02G283700	0.0015	0	8.48	0.01	no known Domain
2D		42	S16_366162718	TraesCS2D02G283800	0.0015	0	8.48	0.01	RecQ-mediated genome instability protein 1
2D		42	S16_366162718	TraesCS2D02G283900	0.0015	0	8.48	0.01	NAD(P)-binding domain superfamily
2D		42	S16_366162718	TraesCS2D02G284000	0.0015	0	8.48	0.01	NAD(P)-binding domain superfamily
2D		42	S16_366162718	TraesCS2D02G284100	0.0015	0	8.48	0.01	ACT domain-containing protein ACR1-12
2D		42	S16_366162718	TraesCS2D02G284200	0.0015	0	8.48	0.01	Protein kinase-like domain superfamily
2D		42	S16_366162718	TraesCS2D02G284300	0.0015	0	8.48	0.01	Thioredoxin-like superfamily
2D		42	S16_366162718	TraesCS2D02G284400	0.0015	0	8.48	0.01	P-loop containing nucleoside triphosphate hydrolase
2D		42	S16_366162718	TraesCS2D02G284500	0.0015	0	8.48	0.01	Ubiquitin-like domain superfamily
2D		42	S16_366162718	TraesCS2D02G284600	0.0015	0	8.48	0.01	BRD4-interacting chromatin-remodeling complex-associated protein
2D		42	S16_366162718	TraesCS2D02G284700	0.0015	0	8.48	0.01	PLC-like phosphodiesterase, TIM beta/alpha-barrel domain superfamily
2D		42	S16_366162718	TraesCS2D02G284800	0.0015	0	8.48	0.01	AH/BAR domain superfamily
2D		42	S16_366162718	TraesCS2D02G284900	0.0015	0	8.48	0.01	no known Domain
2D		42	S16_366162718	TraesCS2D02G285000	0.0015	0	8.48	0.01	F-box-like domain superfamily
2D		42	S16_366162718	TraesCS2D02G285100	0.0015	0	8.48	0.01	Class I glutamine amidotransferase-like
2D		42	S16_366162718	TraesCS2D02G285200	0.0015	0	8.48	0.01	no known Domain
2D		42	S16_366162718	TraesCS2D02G285300	0.0015	0	8.48	0.01	TIFY/JAZ family
2D		42	S16_366162718	TraesCS2D02G285400	0.0015	0	8.48	0.01	Nucleotidyltransferase superfamily
2D		42	S16_366162718	TraesCS2D02G285500	0.0015	0	8.48	0.01	no known Domain
2D		42	S16_366162718	TraesCS2D02G285600	0.0015	0	8.48	0.01	Alpha/Beta hydrolase fold
2D		42	S16_366162718	TraesCS2D02G285700	0.0015	0	8.48	0.01	Heavy metal-associated domain superfamily
2D		42	S16_366162718	TraesCS2D02G285800	0.0015	0	8.48	0.01	P-loop containing nucleoside triphosphate hydrolase
2D		42	S16_366162718	TraesCS2D02G285900	0.0015	0	8.48	0.01	no known Domain
2D		42	S16_366162718	TraesCS2D02G286000	0.0015	0	8.48	0.01	Myb-like domain
2D		42	S16_366162718	TraesCS2D02G286100	0.0015	0	8.48	0.01	Histone-fold
2D		42	S16_366162718	TraesCS2D02G286200	0.0015	0	8.48	0.01	RNA-binding domain superfamily
2D		42	S16_366162718	TraesCS2D02G286300	0.0015	0	8.48	0.01	DNA-binding domain superfamily
2D		42	S16_366162718	TraesCS2D02G286400	0.0015	0	8.48	0.01	Glycyl-tRNA synthetase/DNA polymerase subunit gamma-2
2D		42	S16_366162718	TraesCS2D02G286500	0.0015	0	8.48	0.01	Rieske [2Fe-2S] iron-sulphur domain superfamily
2D		42	S16_366162718	TraesCS2D02G286600	0.0015	0	8.48	0.01	Exostosin-like
3D		43	S17_352108069	TraesCS3D02G248700	0.0018	0	7.88	0.012	P-loop containing nucleoside triphosphate hydrolase
3D		43	S17_352108069	TraesCS3D02G248800	0.0018	0	7.88	0.012	Glycoside hydrolase superfamily
3D		43	S17_352108069	TraesCS3D02G248900	0.0018	0	7.88	0.012	Ribosomal RNA assembly KRR1
3D		43	S17_352108069	TraesCS3D02G249000	0.0018	0	7.88	0.012	PPM-type phosphatase domain superfamily
3D		43	S17_352108069	TraesCS3D02G249100	0.0018	0	7.88	0.012	DNA-binding pseudobarrel domain superfamily
3D		43	S17_352108069	TraesCS3D02G249200	0.0018	0	7.88	0.012	Haem peroxidase superfamily
3D		43	S17_352108069	TraesCS3D02G249300	0.0018	0	7.88	0.012	Cytidine deaminase-like
3D		43	S17_352108069	TraesCS3D02G249400	0.0018	0	7.88	0.012	S-adenosyl-L-methionine-dependent methyltransferase
3D		43	S17_352108069	TraesCS3D02G249500	0.0018	0	7.88	0.012	Glycoside hydrolase superfamily
3D		43	S17_352108069	TraesCS3D02G249600	0.0018	0	7.88	0.012	Domain of unknown function DUF1618
3D		43	S17_352108069	TraesCS3D02G249700	0.0018	0	7.88	0.012	F-box-like domain superfamily
3D		43	S17_352108069	TraesCS3D02G249800	0.0018	0	7.88	0.012	no known Domain
3D		43	S17_352108069	TraesCS3D02G249900	0.0018	0	7.88	0.012	no known Domain
3D		43	S17_352108069	TraesCS3D02G250000	0.0018	0	7.88	0.012	no known Domain
3D		43	S17_352108069	TraesCS3D02G250100	0.0018	0	7.88	0.012	no known Domain
3D		43	S17_352108069	TraesCS3D02G250200	0.0018	0	7.88	0.012	no known Domain
3D		43	S17_352108069	TraesCS3D02G250300	0.0018	0	7.88	0.012	no known Domain
3D		43	S17_352108069	TraesCS3D02G250400	0.0018	0	7.88	0.012	no known Domain
3D		43	S17_352108069	TraesCS3D02G250500	0.0018	0	7.88	0.012	TMEM222/RTE1
3D		43	S17_352108069	TraesCS3D02G250600	0.0018	0	7.88	0.012	Pyridoxal phosphate-dependent transferase
3D		43	S17_352108069	TraesCS3D02G250700	0.0018	0	7.88	0.012	Protein kinase-like domain superfamily
3D		43	S17_352108069	TraesCS3D02G250800	0.0018	0	7.88	0.012	Metalloenzyme, LuxS/M16 peptidase-like
3D		43	S17_352108069	TraesCS3D02G250900	0.0018	0	7.88	0.012	P-loop containing nucleoside triphosphate hydrolase
3D		43	S17_352108069	TraesCS3D02G251000	0.0018	0	7.88	0.012	Alpha/Beta hydrolase fold
3D		43	S17_352108069	TraesCS3D02G251100	0.0018	0	7.88	0.012	FAD/NAD(P)-binding domain superfamily
3D		43	S17_352108069	TraesCS3D02G251200	0.0018	0	7.88	0.012	Protein of unknown function DUF761, plant
3D		43	S17_352108069	TraesCS3D02G251300	0.0018	0	7.88	0.012	WD40-repeat-containing domain superfamily
3D		43	S17_352108069	TraesCS3D02G251400	0.0018	0	7.88	0.012	Protein kinase-like domain superfamily
3D		43	S17_352108069	TraesCS3D02G251500	0.0018	0	7.88	0.012	SurE-like phosphatase/nucleotidase superfamily
3D		43	S17_352108069	TraesCS3D02G251600	0.0018	0	7.88	0.012	Homeobox-like domain superfamily
3D		43	S17_352108069	TraesCS3D02G251700	0.0018	0	7.88	0.012	Mitochondrial carrier domain superfamily
3D		43	S17_352108069	TraesCS3D02G251800	0.0018	0	7.88	0.012	IQ motif, EF-hand binding site
3D		43	S17_352108069	TraesCS3D02G251900	0.0018	0	7.88	0.012	Cytokinin riboside 5'-monophosphate phosphoribohydrolase LOG
3D		43	S17_352108069	TraesCS3D02G252000	0.0018	0	7.88	0.012	Protein kinase-like domain superfamily
3D		43	S17_352108069	TraesCS3D02G252100	0.0018	0	7.88	0.012	Magnesium transporter NIPA
3D		43	S17_352108069	TraesCS3D02G252200	0.0018	0	7.88	0.012	Transferase
3D		44	S17_381020247	TraesCS3D02G274900	0.0018	0	8.07	0.007	Golgin subfamily A member 5
3D		44	S17_381020247	TraesCS3D02G275000	0.0018	0	8.07	0.007	Protein kinase-like domain superfamily
3D		44	S17_381020247	TraesCS3D02G275100	0.0018	0	8.07	0.007	Isopenicillin N synthase-like
3D		44	S17_381020247	TraesCS3D02G275200	0.0018	0	8.07	0.007	P-loop containing nucleoside triphosphate hydrolase
3D		44	S17_381020247	TraesCS3D02G275300	0.0018	0	8.07	0.007	HPT domain superfamily
3D		44	S17_381020247	TraesCS3D02G275400	0.0018	0	8.07	0.007	PUA-like superfamily
3D		44	S17_381020247	TraesCS3D02G275500	0.0018	0	8.07	0.007	NAD(P)-binding domain superfamily
3D		44	S17_381020247	TraesCS3D02G275600	0.0018	0	8.07	0.007	Tryptophan-tRNA ligase, bacterial-type
3D		44	S17_381020247	TraesCS3D02G275700	0.0018	0	8.07	0.007	Transferrin receptor-like, dimerisation domain superfamily
3D		44	S17_381020247	TraesCS3D02G275800	0.0018	0	8.07	0.007	Transferrin receptor-like, dimerisation domain superfamily
3D		44	S17_381020247	TraesCS3D02G275900	0.0018	0	8.07	0.007	P-loop containing nucleoside triphosphate hydrolase
3D		44	S17_381020247	TraesCS3D02G276000	0.0018	0	8.07	0.007	no known Domain
3D		44	S17_381020247	TraesCS3D02G276100	0.0018	0	8.07	0.007	Protein kinase-like domain superfamily
3D		45	S17_515553889	TraesCS3D02G398200	0.002	0	6.8	0.014	NAC domain superfamily
3D		45	S17_515553889	TraesCS3D02G398300	0.002	0	6.8	0.014	Aspartic peptidase domain superfamily
3D		45	S17_515553889	TraesCS3D02G398400	0.002	0	6.8	0.014	no known Domain
3D		45	S17_515553889	TraesCS3D02G398500	0.002	0	6.8	0.014	F-box-like domain superfamily
3D		45	S17_515553889	TraesCS3D02G398600	0.002	0	6.8	0.014	SKP1/BTB/POZ domain superfamily
3D		45	S17_515553889	TraesCS3D02G398700	0.002	0	6.8	0.014	SKP1/BTB/POZ domain superfamily
3D		45	S17_515553889	TraesCS3D02G398800	0.002	0	6.8	0.014	Zinc finger, FYVE/PHD-type
3D		45	S17_515553889	TraesCS3D02G398900	0.002	0	6.8	0.014	Peptide chain release factor class I
3D		45	S17_515553889	TraesCS3D02G399000	0.002	0	6.8	0.014	Nucleotide-diphospho-sugar transferases
3D		45	S17_515553889	TraesCS3D02G399100	0.002	0	6.8	0.014	Root UVB sensitive family
3D		45	S17_515553889	TraesCS3D02G399200	0.002	0	6.8	0.014	P-loop containing nucleoside triphosphate hydrolase
3D		45	S17_515553889	TraesCS3D02G399300	0.002	0	6.8	0.014	no known Domain
3D		45	S17_515553889	TraesCS3D02G399400	0.002	0	6.8	0.014	K Homology domain, type 1 superfamily
3D		45	S17_515553889	TraesCS3D02G399500	0.002	0	6.8	0.014	Protein of unknown function UPF0301
3D		45	S17_515553889	TraesCS3D02G399600	0.002	0	6.8	0.014	DNA-binding domain superfamily
3D		45	S17_515553889	TraesCS3D02G399700	0.002	0	6.8	0.014	Alpha/Beta hydrolase fold
3D		45	S17_515553889	TraesCS3D02G399800	0.002	0	6.8	0.014	Domain of unknown function DUF4220
3D		45	S17_515553889	TraesCS3D02G399900	0.002	0	6.8	0.014	Phosphoribosyltransferase C-terminal
3D		45	S17_515553889	TraesCS3D02G400000	0.002	0	6.8	0.014	no known Domain
3D		45	S17_515553889	TraesCS3D02G400100	0.002	0	6.8	0.014	DNA-binding pseudobarrel domain superfamily
3D		45	S17_515553889	TraesCS3D02G400200	0.002	0	6.8	0.014	Uncharacterised conserved protein UCP031277
3D		45	S17_515553889	TraesCS3D02G400300	0.002	0	6.8	0.014	Protein kinase-like domain superfamily
3D		45	S17_515553889	TraesCS3D02G400400	0.002	0	6.8	0.014	Cytochrome c-like domain superfamily
3D		45	S17_515553889	TraesCS3D02G400500	0.002	0	6.8	0.014	DNA-binding pseudobarrel domain superfamily
3D		45	S17_515553889	TraesCS3D02G400600	0.002	0	6.8	0.014	Tetratricopeptide-like helical domain superfamily
3D		45	S17_515553889	TraesCS3D02G400700	0.002	0	6.8	0.014	GINS, helical bundle-like domain superfamily
3D		45	S17_515553889	TraesCS3D02G400800	0.002	0	6.8	0.014	no known Domain
3D		45	S17_515553889	TraesCS3D02G400900	0.002	0	6.8	0.014	Zinc finger, RING/FYVE/PHD-type
3D		45	S17_515553889	TraesCS3D02G401000	0.002	0	6.8	0.014	F-box-like domain superfamily
3D		45	S17_515553889	TraesCS3D02G401100	0.002	0	6.8	0.014	Plus3-like superfamily
3D		45	S17_515553889	TraesCS3D02G401200	0.002	0	6.8	0.014	NAC domain superfamily
3D		45	S17_515553889	TraesCS3D02G401300	0.002	0	6.8	0.014	S-adenosyl-L-methionine-dependent methyltransferase
3D		45	S17_515553889	TraesCS3D02G401400	0.002	0	6.8	0.014	Isopenicillin N synthase-like
3D		45	S17_515553889	TraesCS3D02G401600	0.002	0	6.8	0.014	Hpc2-related domain
3D		45	S17_515553889	TraesCS3D02G401700	0.002	0	6.8	0.014	Transcription factor, MADS-box superfamily
3D		45	S17_515553889	TraesCS3D02G401800	0.002	0	6.8	0.014	Protein kinase-like domain superfamily
3D		45	S17_515553889	TraesCS3D02G401900	0.002	0	6.8	0.014	no known Domain
3D		46	S17_547920092	TraesCS3D02G434800	0.0023	0	5.93	0.011	Acetylglutamate kinase-like superfamily
3D		46	S17_547920092	TraesCS3D02G434900	0.0023	0	5.93	0.011	Helix-loop-helix DNA-binding domain superfamily
3D		46	S17_547920092	TraesCS3D02G435000	0.0023	0	5.93	0.011	Coiled-coil domain-containing protein SCD2-like
3D		46	S17_547920092	TraesCS3D02G435100	0.0023	0	5.93	0.011	Knottin, scorpion toxin-like superfamily
3D		46	S17_547920092	TraesCS3D02G435200	0.0023	0	5.93	0.011	Helix-loop-helix DNA-binding domain superfamily
3D		46	S17_547920092	TraesCS3D02G435300	0.0023	0	5.93	0.011	Knottin, scorpion toxin-like superfamily
3D		46	S17_547920092	TraesCS3D02G435400	0.0023	0	5.93	0.011	Glutaminyl-peptide cyclotransferase
3D		46	S17_547920092	TraesCS3D02G435500	0.0023	0	5.93	0.011	no known Domain
3D		46	S17_547920092	TraesCS3D02G435600	0.0023	0	5.93	0.011	no known Domain
3D		46	S17_547920092	TraesCS3D02G435700	0.0023	0	5.93	0.011	Prefoldin
4D		47	S18_501457786	TraesCS4D02G347800	0.0046	0	5.35	0.009	Flowering-promoting factor 1
6D	Pm45 (43)	48	S20_29928375	TraesCS6D02G063600	0.0029	0	5.48	0.01	no known Domain
6D		48	S20_29928375	TraesCS6D02G063700	0.0029	0	5.48	0.01	F-box-like domain superfamily
6D		48	S20_29928375	TraesCS6D02G063800	0.0029	0	5.48	0.01	Phylloplanin-like
6D		48	S20_29928375	TraesCS6D02G063900	0.0029	0	5.48	0.01	Papain-like cysteine peptidase superfamily
6D		48	S20_29928375	TraesCS6D02G064000	0.0029	0	5.48	0.01	no known Domain
6D		48	S20_29928375	TraesCS6D02G064100	0.0029	0	5.48	0.01	Glycosyl hydrolase, five-bladed beta-propellor domain superfamily
6D		48	S20_29928375	TraesCS6D02G064200	0.0029	0	5.48	0.01	Glycosyl hydrolase, five-bladed beta-propellor domain superfamily
6D		48	S20_29928375	TraesCS6D02G064300	0.0029	0	5.48	0.01	Glycosyl hydrolase, five-bladed beta-propellor domain superfamily
6D		48	S20_29928375	TraesCS6D02G064400	0.0029	0	5.48	0.01	Glycosyl hydrolase, five-bladed beta-propellor domain superfamily
6D		48	S20_29928375	TraesCS6D02G064500	0.0029	0	5.48	0.01	no known Domain
6D		49	S20_440652781	TraesCS6D02G339500	0.0027	0	6.68	0.007	Papain-like cysteine peptidase superfamily
6D		49	S20_440652781	TraesCS6D02G339600	0.0027	0	6.68	0.007	Protein kinase-like domain superfamily
6D		49	S20_440652781	TraesCS6D02G339700	0.0027	0	6.68	0.007	ATPase, nucleotide binding domain
6D		49	S20_440652781	TraesCS6D02G339800	0.0027	0	6.68	0.007	ATPase, nucleotide binding domain
6D		49	S20_440652781	TraesCS6D02G339900	0.0027	0	6.68	0.007	F-box-like domain superfamily
6D		49	S20_440652781	TraesCS6D02G340000	0.0027	0	6.68	0.007	no known Domain
6D		49	S20_440652781	TraesCS6D02G340100	0.0027	0	6.68	0.007	F-box-like domain superfamily
6D		49	S20_440652781	TraesCS6D02G340200	0.0027	0	6.68	0.007	Neprosin
6D		49	S20_440652781	TraesCS6D02G340300	0.0027	0	6.68	0.007	Protein POLAR-like
6D		49	S20_440652781	TraesCS6D02G340400	0.0027	0	6.68	0.007	Protein POLAR-like
6D		49	S20_440652781	TraesCS6D02G340500	0.0027	0	6.68	0.007	Neprosin
6D		49	S20_440652781	TraesCS6D02G340600	0.0027	0	6.68	0.007	Neprosin
6D		49	S20_440652781	TraesCS6D02G340700	0.0027	0	6.68	0.007	Photosystem II PsbR
6D		49	S20_440652781	TraesCS6D02G340800	0.0027	0	6.68	0.007	F-box-like domain superfamily
6D		49	S20_440652781	TraesCS6D02G340900	0.0027	0	6.68	0.007	F-box-like domain superfamily
6D		49	S20_440652781	TraesCS6D02G341000	0.0027	0	6.68	0.007	F-box-like domain superfamily
6D		49	S20_440652781	TraesCS6D02G341100	0.0027	0	6.68	0.007	F-box-like domain superfamily
6D		49	S20_440652781	TraesCS6D02G341200	0.0027	0	6.68	0.007	Helix-loop-helix DNA-binding domain superfamily
6D		49	S20_440652781	TraesCS6D02G341300	0.0027	0	6.68	0.007	P-loop containing nucleoside triphosphate hydrolase
6D		49	S20_440652781	TraesCS6D02G341400	0.0027	0	6.68	0.007	Tetratricopeptide-like helical domain superfamily
6D		49	S20_440652781	TraesCS6D02G341500	0.0027	0	6.68	0.007	Ribonuclease H-like superfamily
6D		49	S20_440652781	TraesCS6D02G341600	0.0027	0	6.68	0.007	Rx, N-terminal
7D	Pm38 (37) Pm29 (6,28) Pm19 (6)	50	S21_609412828	TraesCS7D02G503800	0.0026	0	22.22	0.009	Homeobox-like domain superfamily	Major effect MTA on Chr7DL encodes for a Homeobox-like transcription factor The highest log(p) value in our study was estimated for the MTA 50 in Chr7DL, we therefore were interested in evaluating the novelty of this locus as resistance locus. MTA 50 spans a 883,188 bp region on the long arm of chromosome 7D (chr7D:609348664..610231852). This MTA comprises 7 highly significant SNPs in high LD to …
7D		50	S21_609412828	TraesCS7D02G503900	0.0026	0	22.22	0.009	no known Domain
7D		51	S21_627304957	TraesCS7D02G535100	0.0098	0.03	5.24	0.005	Zinc finger C2H2 superfamily
