# Supplementary material for: Mining for New Sources of Resistance to Powdery Mildew in Genetic Resources of Winter Wheat
Source: Front Plant Sci. 2022 Mar 1;13:836723. doi: 10.3389/fpls.2022.836723 (PMC8922026; doi:10.3389/fpls.2022.836723)
Supplement: Supplementary file 4 [file Table_4.XLSX]

## Sheet: Sheet1
Mehltau - Weizen - Virulenzpruefungen Jahre 1992-1998
IT = Infektionstyp; % = Befallsstaerke
Reaktion: a = avirulent; iii = intermediaer; VVV = virulent
S= susceptible; SI= susceptible intermediate; RI= resistant intermediate					Kanzler		Axminster/8*CC		Ukla/8*CC		Asosan/8*CC		Chul/8*CC		Sonora/8*CC		Kolibri		M.Amber/8*CC		Khapli/8*CC		Armada		Hope		Timgalen		Transfed		Salzmünde 14-44		Penjamo 62		Amigo		Brigand		Maris Dove		Sorbas		Weihenstephan 623-65		Greif		Coker 983		Albrecht
R= resistant
Nr.	von	Ort	Kanton	Datum	Pm	Pm	Pm	Pm	Pm	Pm	Pm	Pm	Pm	Pm	Pm	Pm	Pm	Pm	Pm	Pm	Pm	Pm	Pm	Pm	Pm	Pm	Pm	Pm	Pm	Pm	Pm	Pm	Pm	Pm	Pm	Pm	Pm	Pm	Pm	Pm	Pm	Pm	Pm	Pm	Pm	Pm	Pm	Pm	Pm
Isolat	Sorte				-	-	1	1	2	2	3a	3a	3b	3b	3c	3c	3d	3d	3f	3f	4a	4a	4b	4b	5	5	6	6	7	7	8	8	10	10	17	17	2,	2,	2,	2,	4b,	4b,	4b,	4b,	5,	5,	5,	5,	6,
			W=West-CH																																		6	6	Mld	Mld	6	6	8	8	6	6	6	6	8
	SPOFA=Sporenfalle		M=Mitte
	KANZ= Kanzler		O=Ost-CH
	ARIN=Arina
					%	IT	%	IT	%	IT	%	IT	%	IT	%	IT	%	IT	%	IT	%	IT	%	IT	%	IT	%	IT	%	IT	%	IT	%	IT	%	IT	%	IT	%	IT	%	IT	%	IT	%	IT	%	IT	%
92315	SPOFA KANZ	RUETI-OFTRINGEN	M	06/25/1992	100	S	100	S	100	SI	80	SI	0	R	80	S	50	RI			80	S	80	S	80	S	100	IS	20	IR	80	S			10	RI	100	S	100	IS	100	S	100	S	100	S			100
[truncated: 72 more columns]
