# Supplementary material for: Mining for New Sources of Resistance to Powdery Mildew in Genetic Resources of Winter Wheat
Source: Front Plant Sci. 2022 Mar 1;13:836723. doi: 10.3389/fpls.2022.836723 (PMC8922026; doi:10.3389/fpls.2022.836723)
Supplement: Supplementary file 6 [file Data_Sheet_1.CSV]

Genotype_ID	V1	V2	BLUEs	MTA	MTA.n
TRI_6313_1626	-0,007568224	0,008170265	-5,95	_M1_M11_M12_M13_M14_M15_M16_M17_M18_M19_M21_M22_M23_M24_M25	15
TRI_13578_7366	-0,005440264	-0,001658734	-5,95	_M1_M11_M12_M13_M14_M15_M16_M17_M18_M19_M20_M21_M22_M23_M24_M25_M40_M41_M42	19
TRI_24675_5664	-0,007650221	0,00860718	-4,77	_M1_M11_M12_M13_M14_M15_M16_M17_M18_M19_M20_M21_M23_M24	14
TRI_19756_4858	-0,007600404	0,008164748	-2,65	_M1_M11_M12_M13_M14_M15_M16_M17_M18_M19_M20_M21_M22_M23_M24_M25_M50	17
TRI_17844_1345	0,003067605	-0,00581472	-2,15	_M1_M11_M12_M13_M14_M15_M16_M17_M18_M19_M20_M21_M22_M23_M24_M25	16
TRI_10892_263	0,079174712	0,046251551	-0,68	_M1_M2_M4_M9_M10_M26_M33_M34_M35_M39_M43_M45_M46_M50	14
TRI_21481_4167	0,002473038	-0,006336195	-0,63	_M1_M11_M12_M13_M14_M15_M16_M17_M18_M19_M20_M21_M22_M23_M24_M25	16
TRI_10849_658	0,077767408	0,045213455	-0,03	_M1_M2_M4_M9_M10_M26_M33_M34_M35_M39_M43_M45_M46_M50	14
TRI_10971_2034	0,078409993	0,042426007	0,27	_M1_M2_M4_M9_M10_M33_M34_M35_M39_M43_M45_M50	12
TRI_9352_1449	0,079390326	0,042459074	1,28	_M1_M2_M4_M9_M10_M33_M34_M35_M43_M45_M50	11
TRI_10870_3573	0,080076588	0,0455539	4,27	_M1_M2_M4_M9_M10_M33_M34_M35_M39_M43_M45_M46_M50	13
TRI_16733_4651	-0,014964341	0,009779986	4,30	_M1_M11_M12_M13_M14_M15_M16_M17_M18_M19_M20_M21_M22_M23_M24_M25_M30	17
TRI_17391_2886	0,022102231	-0,021131698	6,40	_M1_M11_M12_M13_M14_M15_M16_M17_M18_M19_M20_M21_M22_M23_M24_M25	16
TRI_10856_3403	0,078128163	0,043830883	7,57	_M1_M2_M4_M9_M10_M26_M33_M34_M35_M43_M45_M46_M50	13
TRI_14870_2625	0,010673725	0,009339148	7,92	_M1_M11_M12_M13_M14_M15_M16_M17_M18_M19_M20_M21_M23_M24	14
TRI_10893_3912	0,07907442	0,044986442	8,67	_M1_M2_M9_M10_M26_M33_M34_M35_M39_M43_M45_M46_M50	13
TRI_11034_3720	-0,017472878	0,026981357	9,46	_M1_M11_M12_M13_M14_M15_M16_M17_M18_M19_M20_M21_M22_M23_M24_M25_M50	17
TRI_16715_4647	-0,011025684	0,005572869	9,96	_M1_M11_M12_M13_M14_M15_M16_M17_M18_M19_M20_M21_M22_M23_M24_M25	16
TRI_11332_359	0,007495369	-0,030915663	11,73	_M1_M11_M12_M13_M16_M17_M18_M19_M21_M22_M23_M24_M25	13
TRI_10901_1175	0,067652947	0,028142548	12,33	_M1_M2_M4_M9_M10_M33_M34_M35_M39_M50	10
TRI_15143_4154	0,050395382	0,007331706	12,40	_M1_M11_M12_M13_M14_M15_M16_M17_M18_M19_M20_M21_M22_M23_M24_M25_M37_M44	18
TRI_13356_6528	0,056248692	0,005580515	12,49	_M1_M11_M12_M13_M14_M15_M16_M17_M18_M19_M21_M22_M24_M25_M44	15
TRI_10871_3572	0,079216637	0,047240956	13,53	_M1_M10_M26_M33_M34_M39_M43_M45_M46_M50	10
TRI_10863_3577	0,079398426	0,047235292	13,59	_M1_M2_M4_M9_M10_M26_M33_M34_M35_M39_M45_M50	12
TRI_11144_1096	0,07910477	0,045190015	15,07	_M1_M2_M4_M9_M10_M33_M34_M35_M39_M43_M46_M50	12
TRI_16740_1864	-0,006638568	0,003196319	15,88	_M1_M13_M14_M15_M16_M17_M18_M19_M21_M22_M23_M24_M25	13
TRI_10862_3978	0,082311726	0,048191732	15,97	_M1_M2_M4_M9_M10_M26_M33_M34_M35_M39_M43_M45_M50	13
TRI_11033_1920	-0,013709431	0,025107521	16,79	_M1_M11_M12_M13_M14_M15_M16_M17_M18_M19_M20_M21_M23_M24_M25_M50	16
TRI_10899_6027	0,078973033	0,045049046	19,59	_M1_M2_M4_M9_M10_M26_M33_M34_M35_M39_M43_M45_M46_M50	14
TRI_14177_1423	0,018054883	0,003715073	19,84	_M11_M12_M13_M14_M15_M16_M17_M18_M19_M20_M21_M22_M23	13
TRI_15217_4542	0,000340795	-0,008466812	21,87	_M1_M11_M12_M13_M16_M17_M18_M19_M20_M21_M22_M23_M24_M25_M50	15
TRI_16732_4650	-0,0067659	-0,003652143	21,94	_M1_M11_M12_M13_M14_M15_M16_M17_M18_M19_M20_M21_M23_M25	14
TRI_10891_6021	0,078026153	0,044212967	22,05	_M1_M2_M4_M10_M33_M34_M35_M39_M43_M45_M46_M50	12
TRI_13496_7237	0,009121488	0,002855094	22,68	_M1_M11_M12_M13_M14_M15_M16_M17_M18_M19_M20_M21_M22_M23_M24	15
TRI_16574_4630	0,010274858	0,009160587	23,89	_M1_M12_M13_M14_M15_M16_M17_M18_M19_M23_M24	11
TRI_12720_3380	0,003182095	-0,021598832	24,37	_M1_M11_M12_M13_M14_M15_M16_M17_M18_M19_M20_M21_M22_M23_M24_M25_M50	17
TRI_4620_7728	0,015436987	-0,023271701	24,39	_M1_M3_M11_M12_M13_M14_M15_M16_M17_M18_M19_M20_M21_M22_M23_M24_M25	17
TRI_10883_31	0,081789289	0,044359952	24,72	_M1_M2_M4_M9_M10_M33_M34_M35_M39_M43_M45_M46_M50	13
TRI_21144_5033	-0,02589967	0,014741762	26,30	_M1_M11_M12_M13_M14_M15_M16_M17_M18_M19_M21_M22_M23_M24_M25	15
TRI_13488_3134	-0,006614773	0,0003931	27,21	_M11_M12_M13_M14_M15_M16_M17_M18_M19_M20_M21_M23_M24_M25	14
B_94_2142	0,014475696	-0,0190103	27,78	_M1_M11_M12_M13_M14_M15_M16_M17_M18_M19_M20_M21_M22_M23_M24_M25	16
TRI_13492_1154	0,017983087	0,001994	28,69	_M11_M12_M13_M14_M15_M16_M17_M18_M19_M20_M21_M22_M23_M24	14
TRI_14181_3365	0,004751495	0,009242749	29,31	_M1_M11_M12_M13_M14_M15_M16_M17_M18_M19_M21_M22_M23_M24	14
TRI_16728_7918	-0,005817577	-0,010582873	30,76	_M1_M11_M12_M13_M14_M15_M16_M17_M18_M19_M20_M21_M22_M23_M24_M25	16
TRI_17788_7971	-0,021000799	0,006464618	32,05	_M1_M11_M12_M13_M14_M15_M16_M17_M18_M19_M20_M21_M22_M23_M24_M25	16
TRI_16730_7916	-0,010894522	0,005753382	32,09	_M1_M11_M12_M13_M14_M15_M16_M17_M18_M19_M20_M21_M25	13
TRI_15146_2647	-0,004193806	-0,002125228	32,13	_M1_M11_M12_M13_M14_M15_M16_M17_M18_M19_M20_M21_M23_M24	14
TRI_14841_4491	0,011113331	0,008970945	33,99	_M1_M11_M12_M13_M14_M15_M16_M17_M18_M19_M21_M23_M24	13
TRI_13499_4392	-0,002128463	0,005772683	34,11	_M11_M12_M13_M14_M15_M16_M17_M18_M19_M20_M21_M22_M23_M24	14
B_73_3556	0,001444028	-0,009681812	34,74	_M1_M11_M12_M13_M14_M15_M16_M17_M18_M19_M20_M21_M22_M23_M24_M50	16
TRI_14048_3025	0,041477559	-0,00953607	34,75	_M1_M11_M12_M13_M14_M15_M16_M17_M18_M19_M20_M21_M22_M23_M24_M25	16
TRI_22033_8549	0,018895448	-0,022231331	35,40	_M1_M11_M12_M13_M14_M15_M16_M17_M18_M19_M20_M21_M22_M23_M24_M25	16
TRI_21066_2387	0,004360884	0,006813698	35,71	_M1_M7_M11_M12_M13_M14_M15_M16_M17_M18_M19_M20_M21_M22_M23_M24_M25	17
TRI_13495_6310	0,012098316	-0,008001936	36,41	_M11_M12_M13_M14_M15_M16_M17_M18_M19_M20_M21_M22_M23	13
TRI_16731_2214	-0,003462536	-0,004780945	37,13	_M1_M13_M14_M15_M16_M17_M18_M19_M20_M21_M23_M24_M25	13
TRI_9531_509	-0,023631418	0,004698618	38,24	_M1_M11_M12_M13_M14_M15_M16_M17_M18_M19_M21_M22_M23_M24	14
TRI_5217_5049	-0,003717362	-0,016103679	38,31	_M1_M11_M12_M13_M14_M15_M16_M17_M18_M19_M20_M21_M22_M23_M24_M25	16
TRI_17294_7989	-0,025218487	0,011581195	38,42	_M1_M11_M12_M13_M14_M15_M16_M17_M18_M19_M20_M21_M22_M23_M24_M25	16
TRI_14955_4511	-0,010039638	-0,008793972	39,32	_M1_M11_M12_M13_M14_M15_M16_M17_M18_M19_M20_M21_M22_M23_M24_M25	16
TRI_23747_5454	-0,024729394	0,001781077	42,64	_M1_M11_M12_M13_M14_M15_M16_M17_M18_M19_M20_M21_M22_M23_M25	15
TRI_14182_4067	0,014241992	0,008662319	43,20	_M11_M12_M13_M14_M15_M16_M17_M18_M19_M20_M21_M22_M23_M24	14
TRI_22040_5183	0,024813506	-0,014498859	43,27	_M1_M11_M12_M13_M14_M15_M16_M17_M18_M19_M22_M23_M25	13
TRI_16721_4649	-0,023437226	0,010378059	43,67	_M1_M13_M14_M15_M16_M17_M18_M19_M24_M25	10
TRI_10158_1721	0,056760194	0,010363539	43,97	_M1_M13_M14_M15_M16_M17_M18_M19_M21_M24	10
TRI_16719_4648	-0,001006279	-0,015782343	44,67	_M1_M11_M12_M13_M14_M15_M16_M17_M18_M19_M20_M21_M23_M24_M25	15
TRI_24183_8916	-0,038018888	0,016185774	44,95	_M1_M13_M14_M15_M16_M17_M18_M19_M20_M21_M22_M23_M24_M25	14
TRI_10282_2292	-0,024314803	0,01236269	45,43	_M1_M11_M12_M13_M14_M15_M16_M17_M18_M19_M23_M24_M25	13
TRI_17404_7988	-0,014908884	0,004584277	45,74	_M11_M12_M13_M14_M15_M16_M17_M18_M19_M20_M21	11
TRI_21367_8434	-0,001690552	-0,014984512	46,37	_M1_M11_M12_M13_M14_M15_M16_M17_M18_M19_M20_M21_M22_M23_M25	15
TRI_6858_1366	-0,038394506	0,014649778	47,31	_M1_M11_M12_M13_M14_M15_M16_M17_M18_M19_M21_M22_M23_M24	14
TRI_13527_4087	0,010009579	-0,017567258	48,02	_M11_M12_M13_M14_M15_M16_M17_M18_M19_M20_M21_M22_M23_M24	14
TRI_14115_767	-0,022277173	0,010328018	48,14	_M1_M11_M12_M13_M14_M15_M16_M17_M18_M19_M21_M22_M24_M25	14
TRI_16486_7954	-0,023564984	0,011338968	49,75	_M1_M11_M12_M13_M14_M15_M16_M17_M18_M19_M20_M21_M22_M23_M24_M25	16
TRI_16521_4620	-0,004081546	-0,011391555	51,94	_M1_M13_M14_M15_M16_M17_M18_M19_M21_M22_M24_M25	12
TRI_14158_4447	-0,004193479	-0,016527504	52,16	_M1_M11_M12_M13_M14_M15_M16_M17_M18_M19_M20_M21_M22_M23_M24_M25	16
TRI_16520_1102	-0,009014516	-0,007684372	52,56	_M1_M11_M12_M13_M16_M17_M18_M19_M21_M22_M23_M24_M25	13
TRI_6877_2744	-0,037798924	0,015931525	53,19	_M1_M11_M12_M13_M14_M15_M16_M17_M18_M19_M20_M21_M22_M23_M24_M25	16
TRI_11616_731	-0,004629569	-0,017066061	53,76	_M1_M11_M12_M13_M14_M15_M16_M17_M18_M19_M20_M21_M22_M23_M24_M25	16
TRI_23923_8847	-0,014313568	-0,001272146	53,89	_M1_M11_M12_M13_M14_M15_M16_M17_M18_M19_M20_M21_M23_M24_M25	15
TRI_14866_175	-0,008575743	-0,004364703	54,30	_M1_M11_M12_M13_M14_M15_M16_M17_M18_M19_M20_M21_M22_M23_M24_M25	16
TRI_22729_8701	0,024062815	0,002324196	55,87	_M1_M11_M12_M13_M14_M15_M16_M17_M18_M19_M20_M21_M22_M23_M24_M25_M30	17
TRI_9334_7739	-0,032465554	0,009177968	56,48	_M1_M11_M12_M13_M14_M15_M16_M17_M18_M19_M21_M22_M24_M25	14
TRI_21141_5032	-0,025738762	0,01426212	64,23	_M1_M11_M12_M13_M14_M15_M16_M17_M18_M19_M21_M22_M23_M25	14
TRI_14227_7390	-0,001296277	-0,002061087	73,18	_M1_M11_M12_M13_M14_M15_M16_M17_M18_M19_M21_M22_M23_M24_M25	15
